# Supplementary material
Source: PubMed Central journal article supplement (PMC3761327)

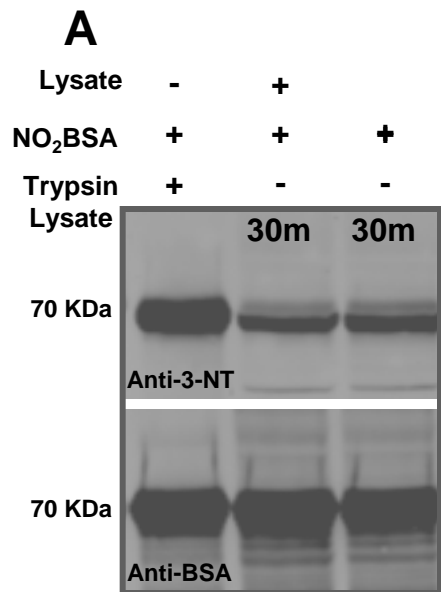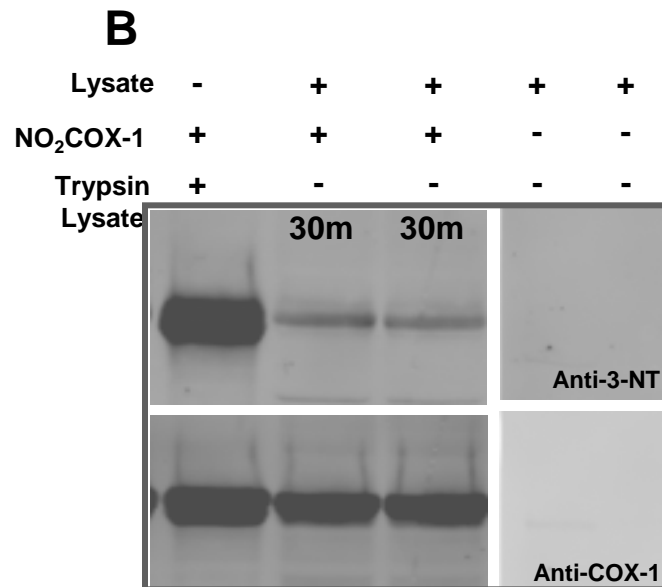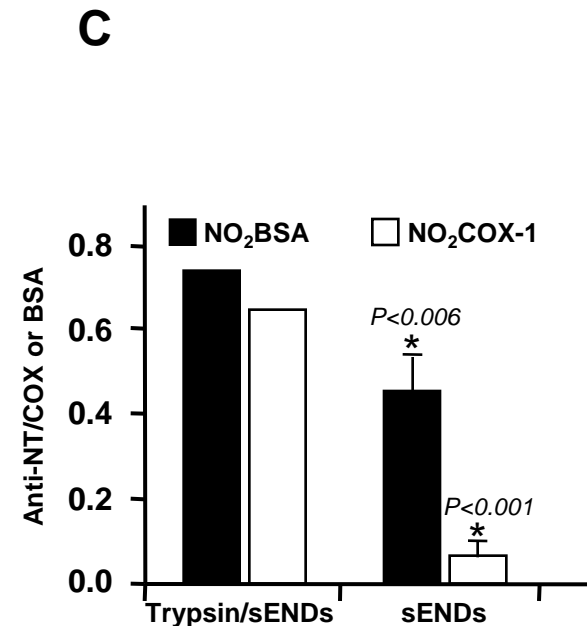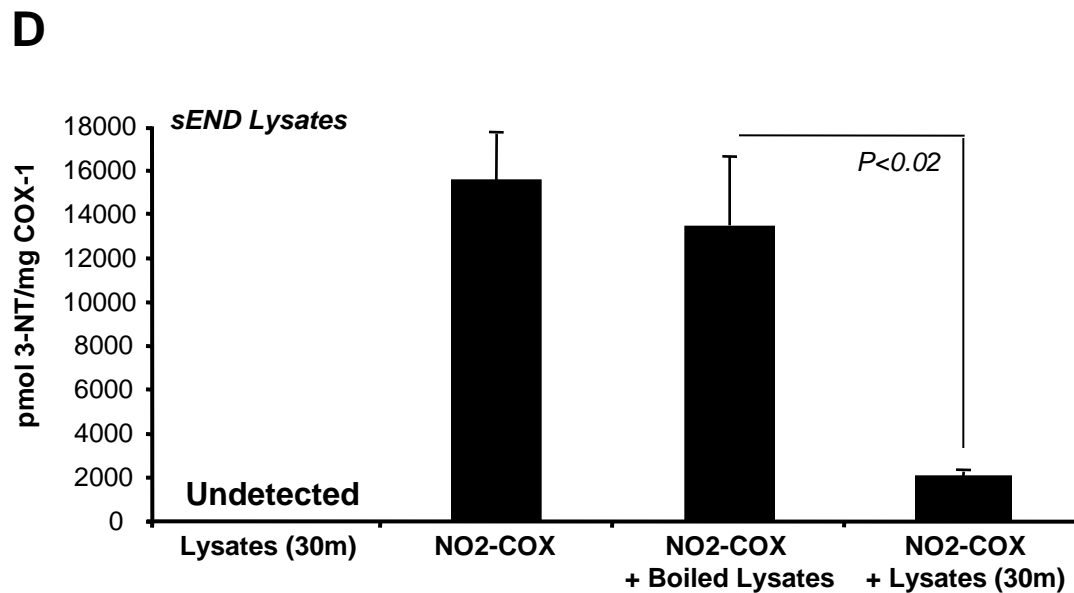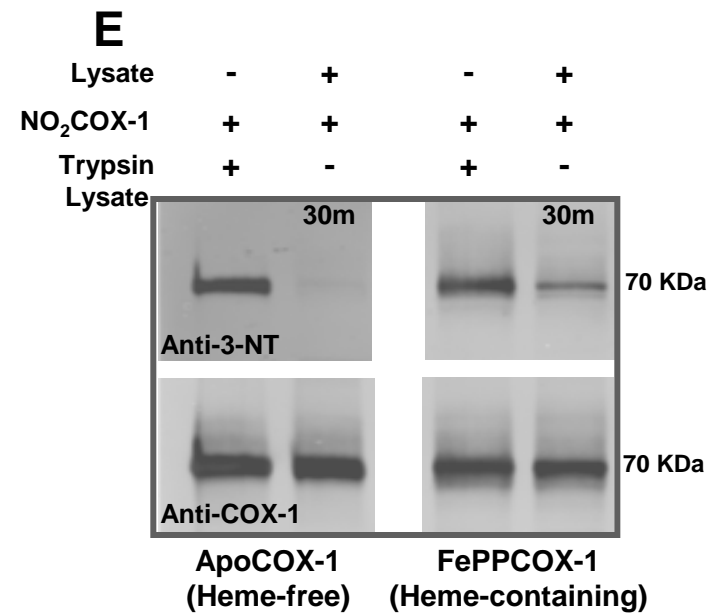

Supplement: RevisedFigure1.pdf [file RevisedFigure1.pdf]

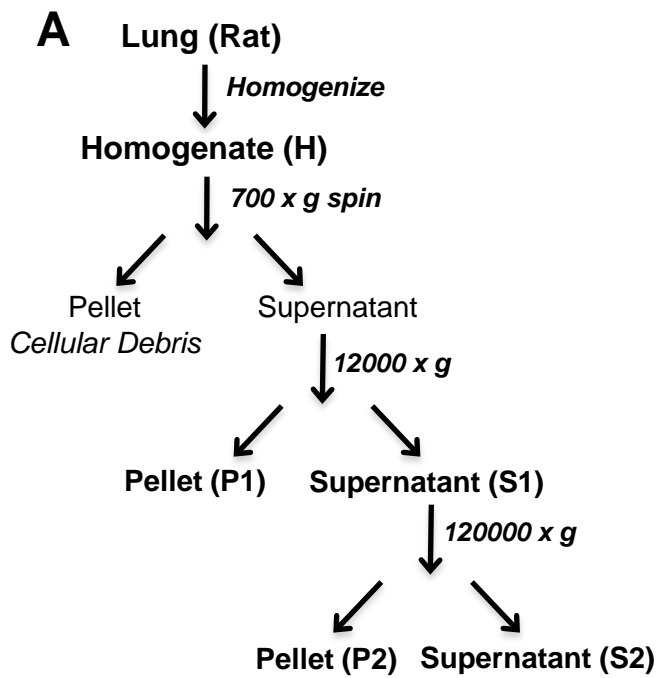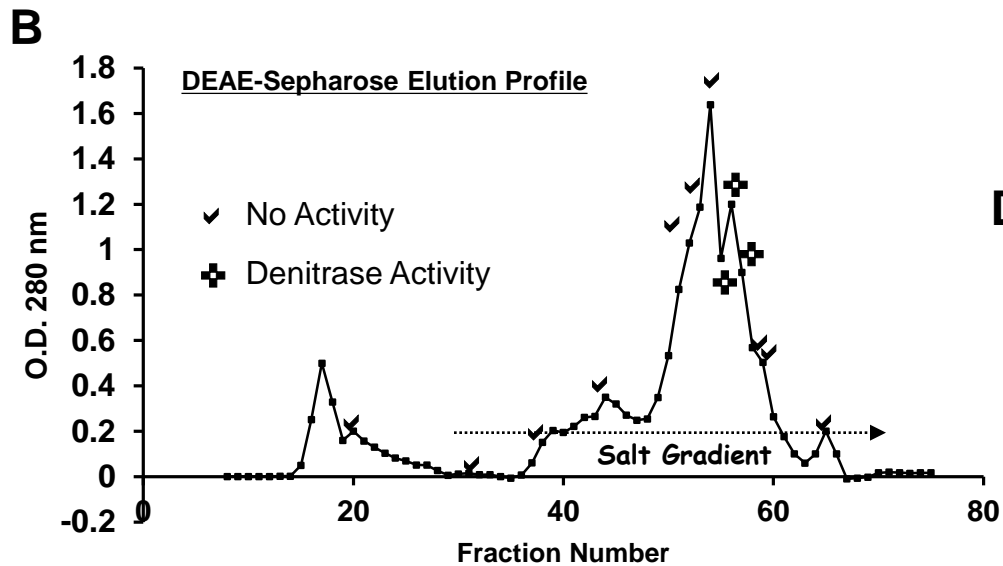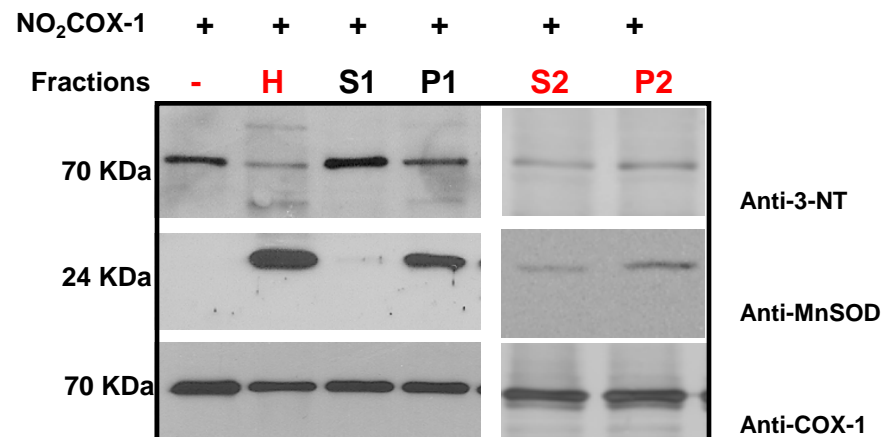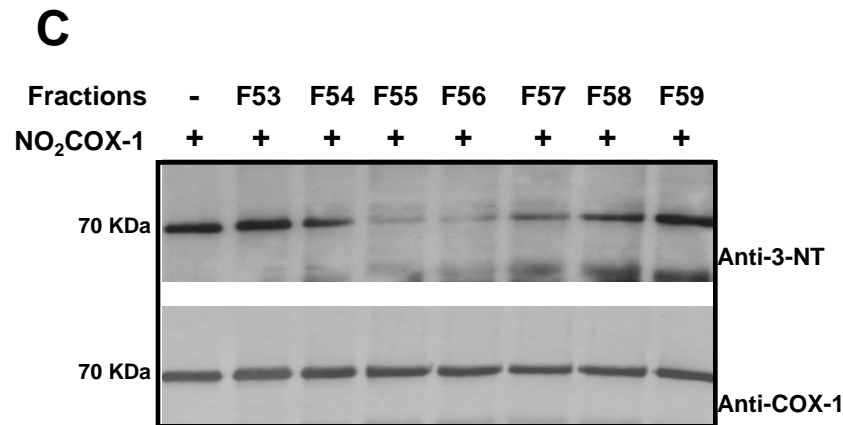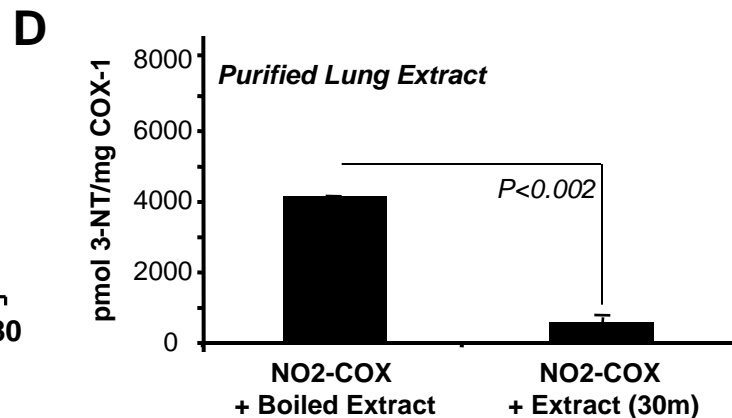

Supplement: RevisedFigure5.pdf [file RevisedFigure5.pdf]
